# Supplementary material for: A Streamlined Method for Detecting Structural Variants in Cancer Genomes by Short Read Paired-End Sequencing
Source: PLoS One. 2012 Oct 29;7(10):e48314. doi: 10.1371/journal.pone.0048314 (PMC3483208; doi:10.1371/journal.pone.0048314)
Supplement: Table S1 — High confidence SVs found by the BreakDancer and SVDetect. (XLS) [file pone.0048314.s001.xls]

## Sheet: SVDetect
type	category		chr1	link1	size (bp)	chr2	link2	supporting read pairs	gene(s)	PCR validation	Sanger validated	comment	Detected by BreakDancer
INTER	INV_TRANSLOC	UNBAL	chr14	54581315-54581592	-	chrX	117029687-117029928	21		somatic	YES	complex rearrangement	yes
INTER	TRANSLOC	UNBAL	chr14	54797610-54797881	-	chrX	117031783-117032032	14		somatic	YES	complex rearrangement	yes
INTRA	DELETION	UNBAL	chr13	19402912-19403159	25562	chr13	19428474-19428706	29	TCRgamma	somatic	YES		yes
INTRA	DELETION	UNBAL	chr12	113426893-113427120	365707	chr12	113792597-113792825	19	Tmem179 and 3 other potential genes	somatic	YES		yes
INTRA	DELETION	UNBAL	chr19	32865203-32865445	538910	chr19	33404048-33404311	12	Pten	somatic	YES		yes
INTRA	DELETION	UNBAL	chr14	54620635-54620883	154044	chr14	54774684-54774889	10	TCR alpha	somatic	YES		yes
INTRA	DELETION	UNBAL	chr12	113473600-113473888	10868	chr12	113484453-113484758	32		somatic	YES		yes
INTRA	DELETION	UNBAL	chr12	98398412-98398578	53622	chr12	98451948-98452181	29		somatic	YES		yes
INTRA	DELETION	UNBAL	chr12	114667288-114667727	1355	chr12	114668763-114669067	19	IgH	somatic	YES		yes
INTRA	DELETION	UNBAL	chr6	41231756-41231989	261771	chr6	41493455-41493761	8	TCR beta	somatic	YES		yes
INTRA	DELETION	UNBAL	chr12	113344580-113344829	456797	chr12	113801374-113801598	6	Aspg,Tmem179,Mir3073,Kif26a	somatic	YES		yes
INTRA	DELETION	UNBAL	chr12	113831192-113831432	56061	chr12	113887244-113887463	5	Inf2,Adssl1, Siva1	somatic	YES		no
INTRA	DELETION	UNBAL	chr12	113235160-113235285	54007	chr12	113289102-113289269	5	Tdrd9	somatic	YES		yes
INTRA	DELETION	UNBAL	chr18	39313354-39313554	270729	chr18	39584005-39584243	5	Arhgap26, Nr3c1	somatic	YES		yes
INTRA	DELETION	UNBAL	chr6	41012524-41012793	479696	chr6	41492161-41492417	5	TCR beta	somatic	YES		yes
INTRA	DELETION	UNBAL	chr6	70556816-70557025	145097	chr6	70701817-70702099	5	Ab parts	somatic	YES		yes
INTRA	DELETION	UNBAL	chr16	92802782-92802916	23139	chr16	92825865-92826020	4	Runx1	somatic	YES		yes
INTRA	DELETION	UNBAL	chr3	9825389-9825640	59054	chr3	9884383-9884667	3	Pag1	somatic	YES		yes
INTRA	DELETION	UNBAL	chr6	41012549-41012643	471380	chr6	41483890-41483964	3	TCR beta	somatic	YES		yes
INTRA	DELETION	UNBAL	chr12	113860548-113860688	104376	chr12	113964889-113965002	2	Adssl1, Siva1, Akt1, Zbtb42	somatic	YES		no
INTRA	DELETION	UNBAL	chr12	113893146-113893309	14304	chr12	113907402-113907563	2	Akt1	somatic	YES		no
INTRA	DELETION	UNBAL	chr14	54323971-54324031	481871	chr14	54805793-54805853	2	TCR alpha	somatic	YES		yes
INTRA	DELETION	UNBAL	chr14	54465213-54465382	365961	chr14	54831168-54831323	5	TCR alpha	somatic	YES		yes
INTRA	DELETION	UNBAL	chr5	101251964-101252065	32117	chr5	101284022-101284158	3	Agpat9	somatic	YES		yes
INTRA	DELETION	UNBAL	chrX	117030056-117030374	1072	chrX	117031135-117031437	17		somatic	YES		yes
INTRA	INVERSION	UNBAL	chr12	113745672-113745994	5124	chr12	113750808-113751112	28	Tmem179	somatic	YES		no
INTRA	INVERSION	UNBAL	chr1	143289678-143289986	1255	chr1	143290908-143291173	11		somatic	YES	complex rearrangement	yes
INTRA	INVERSION	UNBAL	chr12	113223967-113224140	121446	chr12	113345375-113345575	8	Tdrd9, Aspg	somatic	YES		no
INTRA	INVERSION	UNBAL	chr14	54799366-54799601	977	chr14	54800300-54800594	8	TCRalpha	somatic	YES		yes
INTRA	INVERSION	UNBAL	chr12	113251236-113251410	533045	chr12	113784246-113784494	7		somatic	YES		yes
INTRA	INVERSION	UNBAL	chr12	113827534-113827633	1180	chr12	113828713-113828823	7		somatic	YES	complex rearrangement	no
INTRA	INVERSION	UNBAL	chr12	113850282-113850573	3654	chr12	113854036-113854304	5	Inf2	somatic	YES		no
INTRA	INVERSION	UNBAL	chr1	143184262-143184403	106137	chr1	143290412-143290584	3		somatic	YES		yes
INTRA	INVERSION	UNBAL	chr12	113876295-113876531	6025	chr12	113882342-113882552	3		somatic	YES		no
INTRA	INVERSION	UNBAL	chr12	113818845-113819140	164233	chr12	113983213-113983419	5	Inf2, Adssl1, Siva1, Akt1, Zbtb42, AW555464	somatic	YES		no
INTRA	LARGE_DUPLI	UNBAL	chr12	113250045-113250241	28656	chr12	113278699-113278891	16	Tdrd	somatic	YES (complex rearrangement)		yes
INTRA	LARGE_DUPLI	UNBAL	chr12	110147433-110147712	4968976	chr12	115116426-115116729	32	IgH	somatic	YES		yes
INTRA	LARGE_DUPLI	UNBAL	chr12	98398414-98398575	3094822	chr12	101493271-101493491	16	Galc, Kcnk10, Spata7, Ptpn21, Zc3h14, Eml5, Ttc8, Foxn3, Tdp1, Psmc1, Calm1, Kcnk13 and others	somatic	YES		yes
INTRA	LARGE_DUPLI	UNBAL	chr12	98399493-98399584	3094475	chr12	101494019-101494094	4		somatic	YES		yes
INTRA	LARGE_DUPLI	UNBAL	chr8	121139408-121139481	495882	chr8	121635296-121635462	3	Cdh13 (putative)	somatic	YES		yes
INTER	INV_TRANSLOC	BAL	chr4	54487432-54487869	-	chr9	76219853-76219936	14		germline	YES	SINE insertion to chr4	yes
INTER	TRANSLOC	BAL	chr6	86261244-86261482	-	chr16	78005638-78006095	12		germline	YES	SINE insertion to chr16	yes
INTRA	LARGE_DUPLI	UNBAL	chr12	98451873-98452038	3041500	chr12	101493383-101493564	14		germline			yes
INTRA	INV_DUPLI	UNBAL	chr5	79824406-79824887	522	chr5	79825188-79825372	7		germline			yes
INTRA	INV_DUPLI	UNBAL	chr1	140503171-140503234	293	chr1	140503430-140503557	5		germline			yes
INTRA	INVERSION	UNBAL	chr12	101500035-101500360	1527	chr12	101501627-101501897	31		germline			no
INTRA	INVERSION	UNBAL	chr18	11013380-11013559	30122	chr18	11043568-11043644	4		germline			yes
INTRA	INVERSION	UNBAL	chr8	38218275-38218343	842	chr8	38219104-38219187	4		germline			yes
INTRA	INVERSION	UNBAL	chr8	38430439-38430518	1660836	chr8	40091246-40091372	4		germline			yes
INTRA	DELETION	UNBAL	chr12	109656907-109657208	3300973	chr12	112957864-112958175	39	Eml1, Ev1, Yy1, Degs2, Wars, Begain, Dlk1, Meg3, Rtl1, Mirg, Dio3, Cinp, Ankrd9, Tecpr2, Traf3, Amn, Cdc42bpp, Eif5, Tnfaip2, Mark3, Ckb, Bag5 and others	germline			no
INTRA	DELETION	UNBAL	chr12	99432313-99432606	2068293	chr12	101500590-101500872	33	Galc, Gpr65, Kcnk10, Spata7, Ptpn21, Zc3h14, Em15, Ttc8, Foxn3, Tdp1, Kcnk13, Psmc1, Calm1 and others	germline			yes
INTRA	DELETION	UNBAL	chr12	98451895-98452184	3040083	chr12	101491942-101492239	27	Galc, Spata7, Ptpn21, Zc3h14, Em15, Ttc8, Foxn3, Psmc1, Calm1, Kcnk13 and others	germline			no
INTRA	DELETION	UNBAL	chr1	152210621-152210734	11329	chr1	152221919-152222016	13	BC003331	germline			yes
INTRA	DELETION	UNBAL	chr7	80091197-80091524	788	chr7	80091996-80092321	11		germline			yes
INTRA	DELETION	UNBAL	chr11	115796681-115796792	25161	chr11	115821816-115821908	10	Sap30bp	germline			yes
INTRA	DELETION	UNBAL	chr12	101493879-101494047	11785100	chr12	113278911-113279093	10	>20 genes	germline			no
INTRA	DELETION	UNBAL	chr2	73666615-73666727	13837	chr2	73680417-73680504	10	Atf2	germline		retrogene	yes
INTRA	DELETION	UNBAL	chr11	70958762-70958857	86365	chr11	71045065-71045170	5	Nlrp1b	germline			yes
INTRA	DELETION	UNBAL	chr2	5873545-5873664	5144	chr2	5878646-5878776	4	Upf2	germline			yes
INTRA	DELETION	UNBAL	chr14	52370019-52370143	103542	chr14	52473559-52473613	3	Ear6	germline			no
INTRA	DELETION	UNBAL	chr5	24859143-24859226	1364	chr5	24860461-24860537	3	Mll3	germline			yes

## Sheet: BreakDancer
chr14	54581587	0+16-	chrX	117029687	0+16-	CTX	-299	99	16	lane5_NoIndex_L005-sort.bam.rmdup.bam|16		somatic
chr14	54797876	0+15-	chrX	117031784	15+0-	CTX	-299	99	15	lane5_NoIndex_L005-sort.bam.rmdup.bam|15		somatic
chr13	19403163	14+0-	chr13	19428474	0+13-	DEL	25286	99	13	lane5_NoIndex_L005-sort.bam.rmdup.bam|13	0.14	somatic
chr12	113427495	24+3-	chr12	113793128	30+54-	DEL	365438	99	19	lane5_NoIndex_L005-sort.bam.rmdup.bam|19	18.22	somatic
chr19	32865441	12+0-	chr19	33404048	0+14-	DEL	538622	99	12	lane5_NoIndex_L005-sort.bam.rmdup.bam|12	1.55	somatic
chr14	54620879	10+0-	chr14	54774684	0+10-	DEL	153772	99	10	lane5_NoIndex_L005-sort.bam.rmdup.bam|10	0.66	somatic
chr12	113474022	35+3-	chr12	113484453	0+32-	DEL	10568	99	32	lane5_NoIndex_L005-sort.bam.rmdup.bam|32	8.49	somatic
chr12	98398583	30+18-	chr12	98451876	31+82-	DEL	53322	99	30	lane5_NoIndex_L005-sort.bam.rmdup.bam|30	2.1	somatic
chr12	114667850	18+5-	chr12	114668546	2+20-	DEL	1032	99	18	lane5_NoIndex_L005-sort.bam.rmdup.bam|18	1.19	somatic
chr6	41231985	8+0-	chr6	41493455	0+8-	DEL	261472	99	8	lane5_NoIndex_L005-sort.bam.rmdup.bam|8	0.38	somatic
chr12	113344825	8+7-	chr12	113801180	24+21-	DEL	456482	33	3	lane5_NoIndex_L005-sort.bam.rmdup.bam|3	17.47	somatic
chr18	39313550	5+1-	chr18	39584005	0+5-	DEL	270430	92	5	lane5_NoIndex_L005-sort.bam.rmdup.bam|5	2.08	somatic
chr6	70557021	6+0-	chr6	70701808	0+6-	DEL	144782	99	6	lane5_NoIndex_L005-sort.bam.rmdup.bam|6	0.82	somatic
chr16	92802933	6+0-	chr16	92825865	1+3-	DEL	22835	47	3	lane5_NoIndex_L005-sort.bam.rmdup.bam|3	1.76	somatic
chr3	9825636	4+0-	chr3	9884383	0+4-	DEL	58745	72	4	lane5_NoIndex_L005-sort.bam.rmdup.bam|4	1.68	somatic
chr6	41012789	3+0-	chr6	41483890	0+3-	DEL	471081	58	3	lane5_NoIndex_L005-sort.bam.rmdup.bam|3	0.5	somatic
chr14	54465378	5+0-	chr14	54831168	0+5-	DEL	365662	99	5	lane5_NoIndex_L005-sort.bam.rmdup.bam|5	0.78	somatic
chr5	101252173	4+1-	chr5	101284022	0+3-	DEL	31818	55	3	lane5_NoIndex_L005-sort.bam.rmdup.bam|3	1.46	somatic
chr1	143290139	1+13-	chr1	143291168	1+12-	INV	956	99	11	lane5_NoIndex_L005-sort.bam.rmdup.bam|11	1.85	somatic
chr12	113224409	23+14-	chr12	113345570	2+16-	INV	109006	99	10	lane5_NoIndex_L005-sort.bam.rmdup.bam|10	11.36	somatic
chr12	113251422	7+1-	chr12	113785377	30+25-	INV	532772	99	6	lane5_NoIndex_L005-sort.bam.rmdup.bam|6	15.67	somatic
chr12	113852045	41+50-	chr12	113854569	14+19-	INV	3354	78	5	lane5_NoIndex_L005-sort.bam.rmdup.bam|5	25.21	somatic
chr12	113881684	20+340-	chr12	113887618	18+344-	INV	5669	99	316	lane5_NoIndex_L005-sort.bam.rmdup.bam|316	45.58	somatic
chr12	113249686	5+21-	chr12	113279315	24+3-	ITX	28355	99	18	lane5_NoIndex_L005-sort.bam.rmdup.bam|18	9.68	somatic
chr12	110147434	0+29-	chr12	115116709	29+1-	ITX	4968679	99	29	lane5_NoIndex_L005-sort.bam.rmdup.bam|29	6.76	somatic
chr12	98398413	0+18-	chr12	101493560	32+0-	ITX	3094520	99	17	lane5_NoIndex_L005-sort.bam.rmdup.bam|17	2.49	somatic
chr12	98399493	0+4-	chr12	101494090	4+36-	ITX	3094176	90	4	lane5_NoIndex_L005-sort.bam.rmdup.bam|4	2.49	somatic
chr8	121139408	1+3-	chr8	121635458	3+0-	ITX	495582	66	3	lane5_NoIndex_L005-sort.bam.rmdup.bam|3	2.27	somatic
chr14	54324027	2+0-	chr14	54805793	0+2-	DEL	481571	56	2	lane5_NoIndex_L005-sort.bam.rmdup.bam|2	0.79	somatic
chr12	113235870	12+10-	chr12	113287706	10+16-	DEL	53692	52	5	lanes2and3-sorted.rmdup.bam|5	15.93	somatic
chrX	117030370	17+0-	chrX	117031135	0+17-	DEL	756	99	17	lanes2and3-sorted.rmdup.bam|17	0.96	somatic
chr4	54487869	0+8-	chr9	76219868	0+7-	CTX	-299	99	7	lane5_NoIndex_L005-sort.bam.rmdup.bam|7		germline
chr16	78006090	3+9-	chr6	86261245	10+5-	CTX	-299	99	12	lane5_NoIndex_L005-sort.bam.rmdup.bam|12		germline
chr12	98451873	3+49-	chr12	101493560	16+0-	ITX	3041201	99	14	lane5_NoIndex_L005-sort.bam.rmdup.bam|14		germline
chr5	79824457	4+2-	chr5	79825368	13+2-	INV	162	99	8	lane5_NoIndex_L005-sort.bam.rmdup.bam|8	0.35	germline
chr1	140503229	0+4-	chr1	140503551	0+4-	INV	-14	99	4	lane5_NoIndex_L005-sort.bam.rmdup.bam|4	0.75	germline
chr18	11013555	4+0-	chr18	11043640	4+0-	INV	29822	96	4	lane5_NoIndex_L005-sort.bam.rmdup.bam|4	1.77	germline
chr8	38218339	5+0-	chr8	38219183	4+1-	INV	540	99	4	lane5_NoIndex_L005-sort.bam.rmdup.bam|4	0.53	germline
chr8	38430514	6+0-	chr8	40091368	5+0-	INV	1660540	99	5	lane5_NoIndex_L005-sort.bam.rmdup.bam|5	1.87	germline
chr12	99432915	35+29-	chr12	101500729	0+44-	DEL	2067994	99	33	lane5_NoIndex_L005-sort.bam.rmdup.bam|33	2.04	germline
chr1	152210730	14+15-	chr1	152221919	10+16-	DEL	11028	99	14	lane5_NoIndex_L005-sort.bam.rmdup.bam|14	2.58	germline
chr7	80091520	13+1-	chr7	80092057	1+13-	DEL	486	99	12	lane5_NoIndex_L005-sort.bam.rmdup.bam|12	0.13	germline
chr11	115796788	12+8-	chr11	115821816	10+10-	DEL	24861	99	10	lane5_NoIndex_L005-sort.bam.rmdup.bam|10	2.2	germline
chr2	73666736	16+1-	chr2	73680417	13+10-	DEL	13537	99	10	lane5_NoIndex_L005-sort.bam.rmdup.bam|10	2.98	germline
chr11	70958853	5+0-	chr11	71045065	0+5-	DEL	86065	99	5	lane5_NoIndex_L005-sort.bam.rmdup.bam|5	0.56	germline
chr2	5873665	5+13-	chr2	5878529	16+7-	DEL	4857	87	5	lane5_NoIndex_L005-sort.bam.rmdup.bam|5	2.76	germline
chr5	24859222	4+1-	chr5	24860477	1+6-	DEL	1061	76	4	lane5_NoIndex_L005-sort.bam.rmdup.bam|4	2.28	germline
